# Supplementary material
Source: publisher site journal article supplement (https://www.dovepress.com/article/387215)
Supplement: Supplementary file 1 [file get_supplementary_file.php]

| Variable | Univariate | | Multivariate | |
| --- | --- | --- | --- | --- |
| OR (95%CI) | P | aOR (95%CI) | P |
| Gender |  |  |  |  |
| Male | 1.00(reference) | 0.243 |  |  |
| Female | 0.735(0.022-1.681) |  |  |  |
| Age |  |  |  |  |
| <30 | 1.00(reference) |  |  |  |
| 30-50 | 0.694(0.241-1.999) | 0.499 |  |  |
| >50 | 0.156(0.016-1.478) | 0.105 |  |  |
| HIV transmission route |  |  |  |  |
| Homosexual | 1.00(reference) |  |  |  |
| Heterosexual | 1.310(0.354-4.838) | 0.686 |  |  |
| CD4+ T count at baseline, cells/uL |  |  |  |  |
| ＜200 | 1.00(reference) |  |  |  |
| 200–349 | 0.833(0.229-3.028) | 0.782 |  |  |
| ≥350 | 1.364(0.438-4.243) | 0.592 |  |  |
| VL at baseline, cps/ml |  |  |  |  |
| ≤100000 | 1.00(reference) |  |  |  |
| ＞100000 | 0.571(0.395-3.864) | 0.207 |  |  |
| Current VL (cps/ml) |  |  |  |  |
| 50-199 | 1.00(reference) |  |  |  |
| 200-399 | 4.250(0.941-19.199) | 0.060 | 2.528(0.492-12.981) | 0.267 |
| 400-999 | 2.125(0.470-9.599) | 0.327 | 2.466(0.474-12.822) | 0.283 |
| Type of LLV |  |  |  |  |
| Blip | 1.00(reference) |  |  |  |
| pLLV | 0.267(2.080-18.107) | 0.001 | 5.621(1.822-17.341) | 0.003 |
| Subtype |  |  |  |  |
| CRF01_AE | 1.00(reference) |  |  |  |
| CRF07_BC | 0.472(0.105-2.119) | 0.327 |  |  |
| B | 0.708(0.173-2.900) | 0.632 |  |  |
| Others | 1.417(0.393-5.106) | 0.594 |  |  |
| WHO clinical stages |  |  |  |  |
| I | 1.00(reference) |  |  |  |
| II | 0.000(0.000-) | 0.999 |  |  |
| III | 0.000(0.000-) | 0.999 |  |  |
| IV | 3.000(0.257-34.953) | 0.381 |  |  |
| ART regimen |  |  |  |  |
| 2NRTIs+1NNRTI | 1.00(reference) |  |  |  |
| 2NRTIs+1PI | 0.667(0.201-2.796) | 0.141 |  |  |

**Supplementary Table 1. Factors associated with LLV patients who have DRMs**
